# Supplementary material for: Development of a CD8 co-receptor independent T-cell receptor specific for tumor-associated antigen MAGE-A4 for next generation T-cell-based immunotherapy
Source: PubMed Central journal article supplement — J Immunother Cancer. 2021 Mar 25;9(3):e002035. doi: 10.1136/jitc-2020-002035 (PMC7996660; doi:10.1136/jitc-2020-002035), 2021-03-25
Supplement: jitc-2020-002035supp001.pdf [file jitc-2020-002035supp001.pdf]

## Supplementary Figure 1

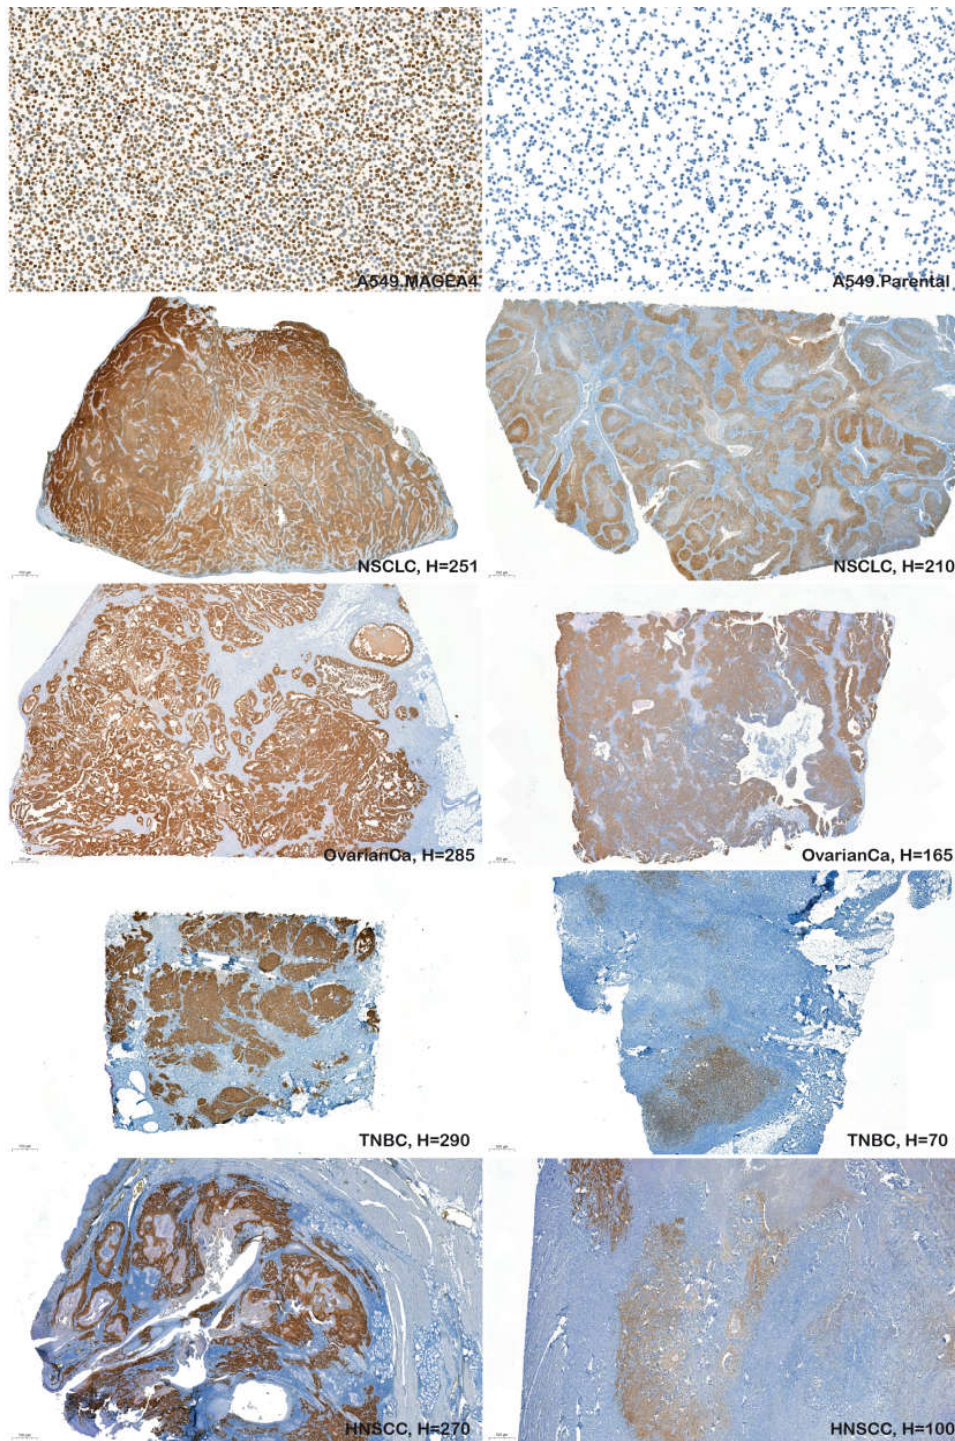**Figure S1: MAGE-A4 is expressed in different solid tumors**

Representative photomicrographs of primary patient-derived cancer tissue sections. A549 cells transduced with MAGE-A4 or not (parental) serve as technical controls. Brown = MAGE-A4 signal, blue = hematoxylin counterstain. H-score (H) is stated for each respective photograph in decreasing order (left to right).

NSCLC = non-small cell lung carcinoma, Ovarian = ovarian carcinoma, HNSCC = head and neck squamous cell carcinoma, TNBC = triple-negative breast carcinoma.

## Supplementary Figure 2

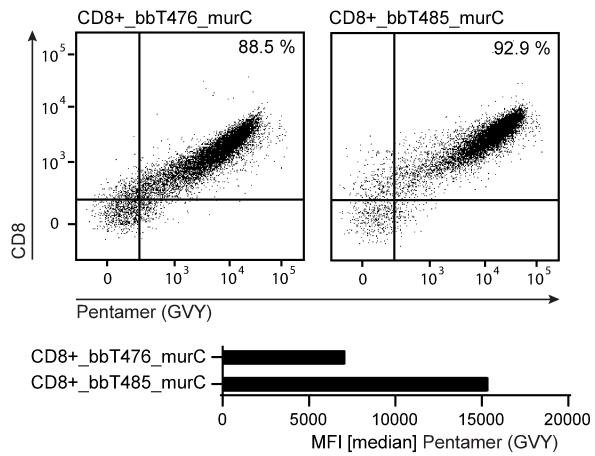

**Figure S2: bbT485 TCR-Ts expressing an allo-derived murinized TCR exhibits superior epitope binding characteristics compared to bbT476 expressing the auto-derived murinized TCR**

Dot plots indicating the percentage of HLA-A2-GVYDGREHTV pentamer-positive CD8+ T cells and bar graphs showing median fluorescence intensity within respective gates, murC indicates use of murinized constant regions for TCR expression. Data shown are representative of 3 different donors for each tested TCR.

## Supplementary Figure 3

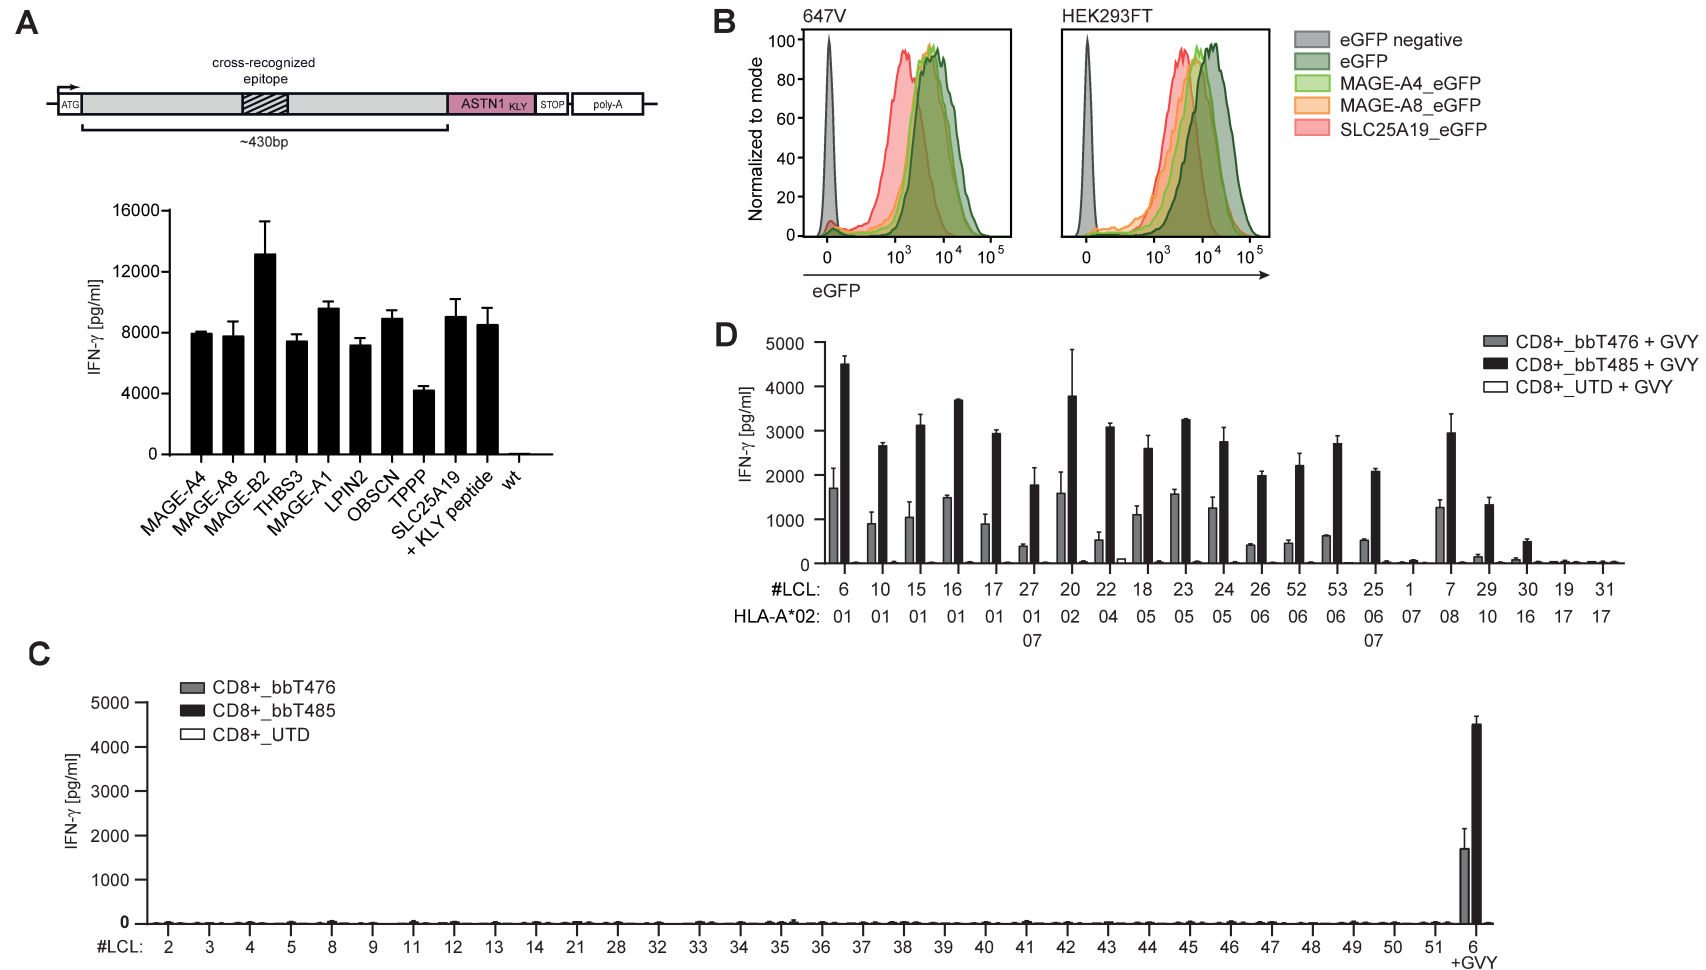**Figure S3: Engineered target cells for safety testing express mismatched sequences and HLA-*allo* cross reactivity**

**A**, An example of used midigene-constructs including the minigene encoding the control epitope ASTN1 (KLYGLDWAEL) is shown above. Bar graphs displaying IFN- $\gamma$  concentrations in supernatants 16 h after co-culture of CD8+ T cells expressing a transgenic control-TCR with A2+K562 cells transfected with ivt-RNA encoding mismatched peptide-sequences or GGYDGREHTV (MAGE-A4) in fusion with a respective control-epitope sequence at the 3' end. A2+K562 cells loaded with the KLYGLDWAEL (KLY) peptide serve as control. Parental protein-names indicate transfected midigene-constructs, wt = non-transfected A2+K562 cells. **B**, Histogram overlays displaying fluorescence intensity of eGFP determined by flow cytometry. Shown are data of 647V cells and HEK293FT cells transduced with eGFP, MAGE-A4\_eGFP, MAGE-A8\_eGFP or SLC25A19\_eGFP. Untransduced T2 cells served as eGFP-negative control. **C**, LCLs expressing different HLA-A, -B and -C allotypes were tested for HLA *allo*-cross recognition in co-culture assays. HLA-typing of each LCL is given in supplementary table 1. HLA-A\*02:01-positive LCL number 6 loaded with the GGY peptide served as positive controls. **D**, IFN- $\gamma$  ELISA after co-culture with LCLs expressing different HLA-A\*02 sub-alleles as indicated on x-axes loaded with the GGY peptide.

## Supplementary Figure 4

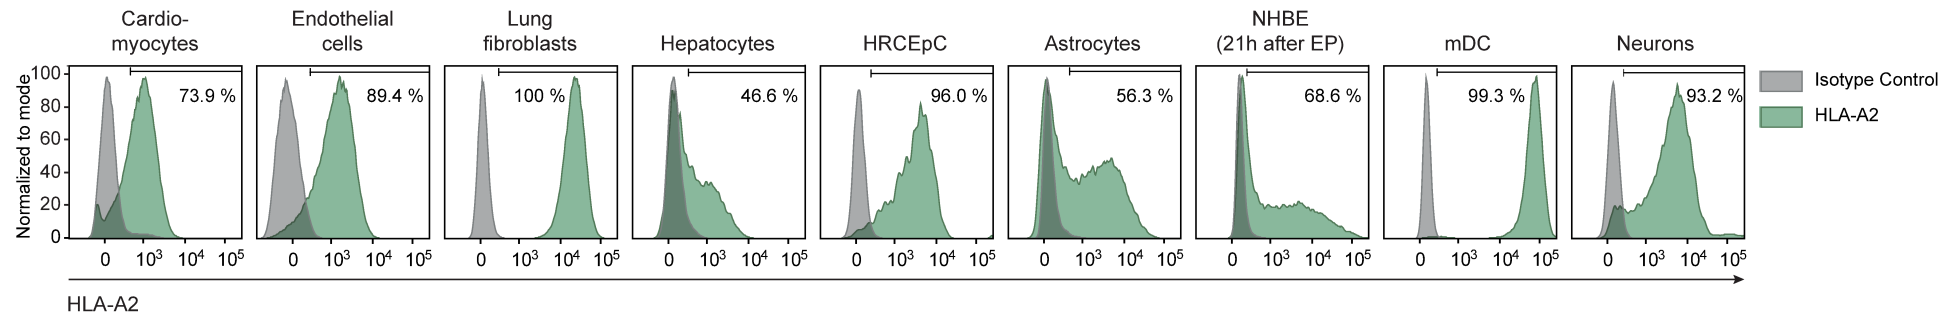**Figure S4: Normal tissue cells applied for safety testing express HLA-A\*02:01-encoded surface protein**

Histogram overlays displaying HLA-A2 expression determined by flow cytometry on indicated primary or iPSC-derived cells. Normal human bronchial epithelial cells (NHBE) were transfected with HLA-A\*02:01-encoding ivt-RNA 21 h prior to assay. HRCEpC = human renal cortical epithelial cells; mDC = monocyte-derived dendritic cells, prepared as described in Material and Methods.



## Supplementary Figure 5

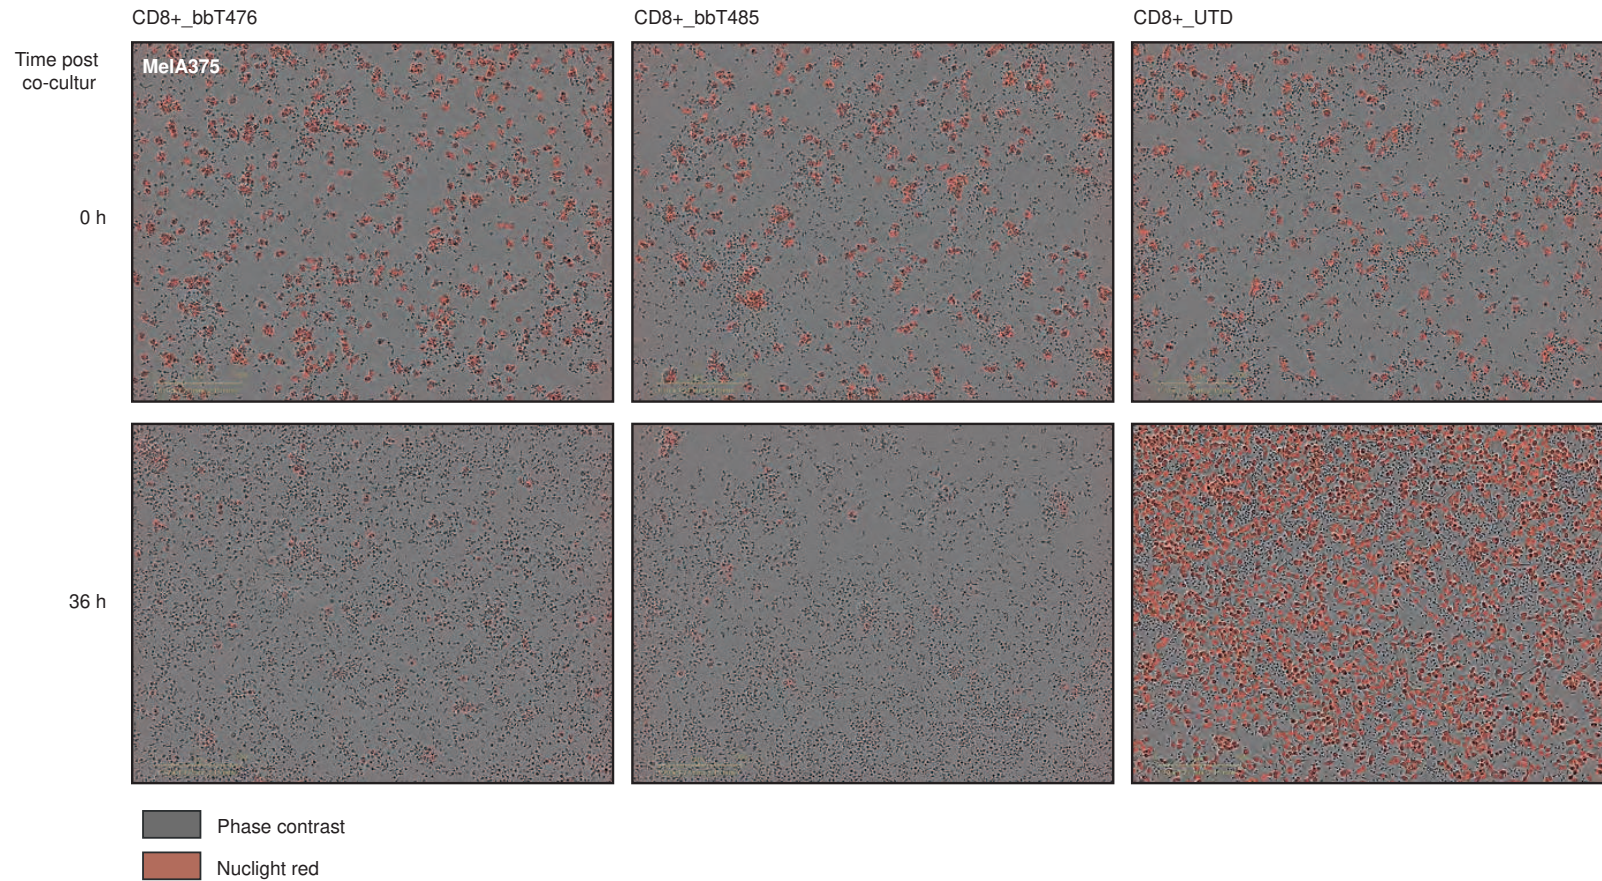**Figure S5: bbT476 and bbT485 TCR-Ts both lyse Mela375 cells**

Incucyte-derived snapshots of Mela375 cells expressing Nuclight Red live-cell labeling reagent (mKate) in co-culture with CD8+ T cells expressing transgenic TCRs (bbT476 or bbT485) or not (UTD = untransduced) immediately after assay set-up and 36 h later. Depicted is mKate-dependent fluorescence (red) and phase contrast (grey). Data shown are representative of 3 different donors for each tested TCR.

Supplementary table 1: List of LCLs with HLA-type

| # LCL | HLA-A        |             | HLA-B     |           | HLA-C     |           |
|-------|--------------|-------------|-----------|-----------|-----------|-----------|
| 1     | 01:01:01G    | 02:07:01G   | 08:01:01G | 27:04:01G | 07:01:01G | 12:02:01G |
| 2     | 01:01:01G    |             | 52:01:01G |           | 12:02:01G |           |
| 3     | 01:01:01G    |             | 57:01:01G |           | 06:02:01G |           |
| 4     | 01:01:01G    |             | 35:02:01G |           | 04:01:01G |           |
| 5     | 01:01:01G    |             | 37:01:01G |           | 06:02:01G |           |
| 6     | 01:01:01G    | 02:01:01G   | 07:02:01G | 39:01:01G | 07:02:01G |           |
| 7     | 01:01:01G    | 02:08       | 08:01:01G | 50:01:01G | 06:02:01G | 07:01:01G |
| 8     | 01:01:01G    | 29:02:01G   | 44:03:01G | 44:05:01  | 02:02:02G | 16:01:01G |
| 9     | 01:01:01G    | 24:02:01G   | 39:06:02G | 58:01:01G | 07:01:01G | 07:02:01G |
| 10    | 02:01:01G    |             | 45:01:01G |           | 16:01:01G |           |
| 11    | 02:01:01G    |             | 40:01:01G |           | 03:04:01G |           |
| 12    | 02:01:01G    |             | 44:02:01G |           | 05:01:01G |           |
| 13    | 02:01:01G    |             | 13:02:01G |           | 06:02:01G |           |
| 14    | 02:01:01G    |             | 18:01:01G |           | 07:01:01G |           |
| 15    | 02:01:01G    |             | 44:02:01G |           | 05:01:01G |           |
| 16    | 02:01:01G    |             | 15:01:01G |           | 03:04:01G |           |
| 17    | 02:01:01G    |             | 08:01:01G | 51:08:01  | 07:01:01G | 16:02:01G |
| 18    | 02:05:01G    | 23:01:01G   | 41:01:01  | 49:01:01G | 07:01:01G | 17:01:01G |
| 19    | 02:17:01G    |             | 15:01:01G |           | 03:03:01G |           |
| 20    | 02:02:01G    | 03:01:01G   | 35:01:01G | 53:01:01G | 04:01:01G |           |
| 21    | 26:01:01G    | 68:01:01G   | 18:01:01G | 35:02:01G | 04:01:01G | 07:01:01G |
| 22    | 02:04:01G    |             | 51:01:01G |           | 15:02:01G |           |
| 23    | 02:05:01G    | 32:01:01G   | 40:01:01G | 49:01:01G | 03:04:01G | 07:01:01G |
| 24    | 02:05:01G    | 03:01:01G   | 41:02:01G | 49:01:01G | 04:01:01G | 07:01:01G |
| 25    | 02:06:01G    | 02:07:01G   | 46:01:01G |           | 01:02:01G | 08:01:01G |
| 26    | 02:06:01G    | 24:02:01G   | 08:01:01G | 35:03:01G | 07:01:01G | 07:02:01G |
| 27    | 02:01:01G    | 02:07:01G   | 46:01:01G |           | 01:02:01G |           |
| 28    | 02:01:01G    | 03:01:01G   | 35:02:01G | 38:01:01  | 04:01:01G | 12:03:01G |
| 29    | 02:10:01G    | 30:01:01G   | 13:02:01G | 40:06:01G | 06:02:01G | 08:01:01G |
| 30    | 02:16:01G    | 03:01:01G   | 51:01:01G |           | 07:04:01G | 15:02:01G |
| 31    | 02:17:01G    |             | 15:01:01G |           | 03:03:01G |           |
| 32    | 03:01:01G    |             | 47:01:01G |           | 06:02:01G |           |
| 33    | 03:01:01G    |             | 35:01:01G | 35:03:01G | 04:01:01G |           |
| 34    | 03:01:01G    |             | 35:01:01G | 56:01:01G | 01:02:01G | 04:01:01G |
| 35    | 03:01:01G    | 32:01:01G   | 07:02:01G | 40:02:01G | 02:02:02G | 07:02:01G |
| 36    | 03:01:01G    | 11:01:01G   | 40:01:01G |           | 03:04:01G |           |
| 37    | 23:01:01G    |             | 14:01:01  |           | 08:02:01G |           |
| 38    | 24:02:01G    |             | 15:17:01G | 51:01:01G | 07:01:01G | 15:04:01G |
| 39    | 24:02:01G    |             | 35:08:01  |           | 04:01:01G |           |
| 40    | 24:02:01G    | 26:02:01    | 40:06:01G | 51:01:01G | 08:01:01G | 14:02:01G |
| 41    | 24:02:01G    | 29:01:01G   | 07:05:01G | 27:02:01G | 02:02:02G | 15:05:01G |
| 42    | 24:02:01:02L |             | 55:01:01G |           | 01:02:01G |           |
| 43    | 25:01:01G    |             | 51:01:01G |           | 01:02:01G |           |
| 44    | 24:02:01G    |             | 40:01:01G |           | 03:04:01G |           |
| 45    | 29:02:01G    |             | 40:02:01G |           | 02:02:02G |           |
| 46    | 30:01:01G    | 68:02:01G   | 42:01:01  |           | 17:01:01G |           |
| 47    | 30:02:01G    |             | 18:01:01G |           | 05:01:01G |           |
| 48    | 31:01:02G    |             | 15:01:01G |           | 01:02:01G |           |
| 49    | 33:01:01G    |             | 14:02:01G |           | 08:02:01G |           |
| 50    | 33:03:01G    |             | 44:03:01G |           | 14:03     |           |
| 51    | 68:02:01G    |             | 53:01:01G |           | 04:01:01G |           |
| 52    | 02:06        | 26:01       | 35:01     | 38:01     | 04:01     | 12:03     |
| 53    | 02:06:01     | 24:02:01:01 | 07:02:01  | 51:03     | 14:02:01  | 07:02:01  |

**Supplementary table 2: HLA-type of primary human and induced pluripotent stem cell (iPSC)-derived cells**

| Cell type                               | HLA-A     |           | HLA-B     |           | HLA-C     |           |
|-----------------------------------------|-----------|-----------|-----------|-----------|-----------|-----------|
| iCell Cardiomyocytes2                   | 02:01     | 02:01     | 40:01     | 82:01     | 03:02     | 03:04     |
| iCell Hepatocytes 2.0                   | 02:01     | 02:01     | 40:01     | 82:01     | 03:02     | 03:04     |
| iCell Astrocytes                        | 02:01     | 02:01     | 40:01     | 82:01     | 03:02     | 03:04     |
| iCell GABANeurons                       | 02:01     | 02:01     | 40:01     | 82:01     | 03:02     | 03:04     |
| iCell Endothelial Cells                 | 02:01     | 02:01     | 40:01     | 82:01     | 03:02     | 03:04     |
| Normal Human Lung Fibroblasts           | 02:01:01G | 11:01:01G | 44:02:01G | 55:01:01G | 03:03:01G | 05:01:01G |
| Normal Human Bronchial Epithelial cells | 03:01:01G | 23:01:01G | 07:02:01G | 14:02:01G | 07:02:01G | 08:02:01G |
| Human Renal Cortical Epithelial cells   | 02:01:01G | 03:01:01G | 15:01:01G | 51:01:01G | 02:02:02G | 15:02:01G |
| Monocyte derived DCs                    | 02:01:01G | 31:01:02G | 40:01:01G | 51:01:01G | 01:02:01G | 03:04:01G |
